# Supplementary material for: Using the co-expression network of T cell-activation-related genes to assess the disease activity in Takayasu’s arteritis patients
Source: Springer Nature journal article supplement (doi:10.1186/s13075-021-02636-2), 2021-12-16
Supplement: MOESM1 [file 19965122]

**Supplementary Table 1 Primers used in real-time fluorescence quantitative polymerase chain reaction**

| Genes        | NCBI Reference Sequence | Forward primer              | Reverse primer          |
|--------------|-------------------------|-----------------------------|-------------------------|
| <i>CCL5</i>  | NC_000017.11            | CCAGCAGTCGTCTTTGTCAC        | CTCTGGGTTGGCACACACTT    |
| <i>P65</i>   | NC_000011.10            | GAAGAAGAGTCCTTTCAGCG        | GGGATGACGTAAAGGGATAG    |
| <i>PDCD1</i> | NC_000002.12            | GTGCCTGTGTTCTCTGTGGA        | TCCGCTAGGAAAGACAATGG    |
| <i>PD-L1</i> | NC_000009.12            | GGTTGTGGATCCAGTCACCT        | TTGGTGGTGGTGGTCTTACC    |
| <i>PD-L2</i> | NC_000009.12            | ACCGTGAAAGAGCCACTTTG        | GCGACCCCATAGATGATTATGC  |
| <i>CTLA4</i> | NC_000002.12            | CATGATGGGGAATGAGTTGACC      | TCAGTCCTTGGATAGTGAGGTTC |
| <i>TIM3</i>  | NC_000005.10            | CTGCTGCTACTACTTACAAGGTC     | GCAGGGCAGATAGGCATTCT    |
| <i>LAG3</i>  | NC_000012.12            | GCGGGGACTTCTCGCTATG         | GGCTCTGAGAGATCCTGGGG    |
| <i>TIGIT</i> | NC_000003.12            | ATACAAGAGCGAAGGTCTCACG      | CTGAGTCTCCATAACAGCGG    |
| <i>CD28</i>  | NC_000002.12            | CTATTTCCCGGACCTTCTAAGCC     | GCGGGGAGTCATGTTTCATGTA  |
| <i>CD40</i>  | NC_000020.11            | TTGGGGTCAAGCAGATTGCTA       | GCAGATGACACATTGGAGAAGA  |
| <i>CD40L</i> | NC_000023.11            | ACATACAACCAAATTCTCCCCG      | GCAAAAAGTGCTGACCCAATCA  |
| <i>TCR</i>   | NC_000014.9             | CCTTCAACAACAGCATTATTATTCCAG | CGAGGGAGCACAGGCTGTCTTA  |
| <i>CD3</i>   | NC_000001.11            | GCCAGAACCAGCTCTATAAC        | GGCCACGTCTCTTGTCCAA     |

|              |              |                            |                          |
|--------------|--------------|----------------------------|--------------------------|
| <i>T-bet</i> | NC_000017.11 | TGACCCAGATGATTGTGCTCCAGT   | AATCTCGGCATTCTGGTAGGCAGT |
| <i>GATA3</i> | NC_000010.11 | CACCACAACCACACTCTG         | GCCTTCCTTCTTCATAGTCA     |
| <i>RORC</i>  | NC_000001.11 | GTGGGGACAAGTCGTCTGG        | AGTGCTGGCATCGGTTTCG      |
| <i>FOXP3</i> | NC_000023.11 | GTGGCCCGGATGTGAGAAG        | GGAGCCCTTGTCGGATGATG     |
| <i>SDHA</i>  | NC_000005.10 | CAGCATGTGTTACCAAGCTGT      | GGTGTCGTAGAAATGCCACCT    |
| <i>HPRT1</i> | NC_000023.11 | TTTATTCCTCATGGACTAATTATGGA | CCTCCCATCTCCTTCATCAC     |
| <i>B2M</i>   | NC_000015.10 | GAGGCTATCCAGCGTACTCCA      | CGGCAGGCATACTCATCTTTT    |
| <i>YWHAZ</i> | NC_000008.11 | AGACGGAAGGTGCTGAGAAA       | CGTTGGGGATCAAGAACTTT     |

---

*CCL5*, C-C motif chemokine ligand 5. *p65*, RELA proto-oncogene NFκB subunit. *PDCD1*, programmed cell death 1, also known as *PD-1*. *PD-L1*, *CD274*. *PD-L2*, programmed cell death 1 ligand 2. *CTLA4*, cytotoxic T-lymphocyte associated protein 4. *TIM3*, T cell immunoglobulin domain and mucin domain 3, also known as hepatitis A virus cellular receptor 2. *LAG3*, lymphocyte activating 3. *TIGIT*, T cell immunoreceptor with Ig and ITIM domains. *TCR*, T cell receptor. *T-bet*, T-box expressed in T cells, also known as T-box transcription factor 21. *GATA3*, GATA binding protein 3. *RORC*, RAR related orphan receptor C. *FOXP3*, forkhead box P3. *SDHA*, succinate dehydrogenase complex flavoprotein subunit A. *HPRT1*, hypoxanthine phosphoribosyl transferase 1. *YWHAZ*, yrosine 3-monooxygenase/tryptophan 5.
